# Supplementary material for: Renal Outcomes With Renin-Angiotensin System Blockers After Unilateral Nephrectomy
Source: PubMed Central journal article supplement — Kidney Int Rep. 2024 Oct 10;10(1):184–96. doi: 10.1016/j.ekir.2024.09.022 (PMC11725802; doi:10.1016/j.ekir.2024.09.022), 2024-10-10
Supplement: mmc1.pdf [file mmc1.pdf]

## Supplementary file

**Supplement to:** Renal outcomes with renin-angiotensin system blockers after unilateral nephrectomy

Sehun Lee et al.

Table of contents:

---

|           |                                                                                                                                                         | Page |
|-----------|---------------------------------------------------------------------------------------------------------------------------------------------------------|------|
| Table S1  | Characteristics of patients who developed end-stage kidney disease                                                                                      | 2    |
| Table S2  | Differences in laboratory findings according to RAS blocker use after nephrectomy                                                                       | 4    |
| Table S3  | Comparison between survived and deceased patients                                                                                                       | 5    |
| Table S4  | Comparison between survived and deceased patients, according to RAS blockers use                                                                        | 7    |
| Table S5  | The risk of mortality and composite outcome of ESKD and mortality according to RAS blocker use with calcium channel blocker instead of $\beta$ -blocker | 9    |
| Table S6  | Characteristics of patients after propensity score matching                                                                                             | 10   |
| Table S7  | Renal outcomes and hyperkalemia findings according to RAS blocker use after propensity score matching                                                   | 12   |
| Table S8  | The risk of mortality and composite outcome of ESKD and mortality after propensity score matching                                                       | 13   |
| Figure S1 | Distribution of propensity scores before and after matching                                                                                             | 14   |
| Figure S2 | Kaplan-Meier curves according to RAS blocker use after propensity score matching                                                                        | 15   |

**Table S1.** Characteristics of patients who developed end-stage kidney disease

| Variables                            | RAS blockers (+)<br>(N=1) | RAS blockers (-)<br>(N=6) |
|--------------------------------------|---------------------------|---------------------------|
| Male                                 | 1 (100%)                  | 4 (67%)                   |
| Age, years                           | 58                        | 61 (43;78)                |
| BMI, kg/m <sup>2</sup>               | 28                        | 23.8 (22.0;31.9)          |
| Cancer type                          |                           |                           |
| Renal cell carcinoma                 | 1 (100%)                  | 2 (33%)                   |
| Urothelial cell carcinoma            | 0                         | 2 (33%)                   |
| Liposarcoma                          | 0                         | 0                         |
| Other                                | 0                         | 2 (33%)                   |
| Cancer stage                         |                           |                           |
| 1                                    | 1 (100%)                  | 3 (50%)                   |
| 2                                    | 0                         | 1 (17%)                   |
| 3                                    | 0                         | 1 (17%)                   |
| 4                                    | 0                         | 1 (17%)                   |
| DM                                   | 0                         | 2 (33%)                   |
| PCI or CABG                          | 0                         | 0                         |
| CVA                                  | 0                         | 0                         |
| Dyslipidemia                         | 0                         | 0                         |
| β-blocker                            | 1 (100%)                  | 4 (67%)                   |
| Calcium channel blocker              | 1 (100%)                  | 4 (67%)                   |
| Diuretics                            | 1 (100%)                  | 0                         |
| Adjuvant Tx., systemic               | 0                         | 0                         |
| Adjuvant Tx., localized              | 0                         | 1 (17%)                   |
| Laboratory findings, preoperative    |                           |                           |
| eGFR, ml/min/1.73 m <sup>2</sup>     | 34.1                      | 24.6 (15.5;104.2)         |
| eGFR < 60 ml/min/1.73 m <sup>2</sup> | 1 (100%)                  | 5 (83%)                   |
| eGFR < 30 ml/min/1.73 m <sup>2</sup> | 0                         | 4 (66%)                   |
| BUN, mg/dl                           | 27.2                      | 34.5 (15.1;54.5)          |
| Hb, g/dl                             | 14.8                      | 11.15 (10.4;16.2)         |
| Potassium, mmol/l                    | 4.7                       | 4.6 (4.2;4.9)             |
| Urine albumin                        |                           |                           |
| Negative                             | 0                         | 1 (17%)                   |
| Trace                                | 0                         | 0                         |
| 1+                                   | 0                         | 1 (17%)                   |
| 2+                                   | 0                         | 1 (17%)                   |
| 3+                                   | 1 (100%)                  | 3 (50%)                   |
| Laboratory findings, at discharge    |                           |                           |
| eGFR, ml/min/1.73 m <sup>2</sup>     | 21.5                      | 16.05 (11.5;51)           |

|                                      |          |         |
|--------------------------------------|----------|---------|
| eGFR < 30 ml/min/1.73 m <sup>2</sup> | 1 (100%) | 5 (83%) |
| Death after ESKD                     | 0        | 2 (33%) |

Continuous variables are expressed as median (range) and categorical variables are expressed as numbers (%).

BMI, body mass index; DM, diabetes mellitus; PCI, percutaneous coronary intervention; CABG, coronary artery bypass graft; CVA, cerebrovascular accident; Tx, treatment; eGFR, estimated glomerular filtration rate; BUN, blood urea nitrogen; Hb, hemoglobin; ESKD, end stage kidney disease

**Table S2.** Differences in laboratory findings according to RAS blocker use after nephrectomy

| <b>Variables</b>                    | <b>Time after surgery</b> | <b>RAS blocker (+)<br/>(N=308)</b> | <b>RAS blocker (-)<br/>(N=272)</b> | <b>P</b> |
|-------------------------------------|---------------------------|------------------------------------|------------------------------------|----------|
| eGFR,<br>ml/min/1.73 m <sup>2</sup> | Discharge                 | 54.6 ± 13.8                        | 51.3 ± 15.9                        | 0.009    |
|                                     | 1 month                   | 53.0 ± 13.6                        | 50.5 ± 16.1                        | 0.041    |
| Hemoglobin, g/dl                    | Discharge                 | 12.2 ± 1.7                         | 12.3 ± 1.6                         | 0.522    |
|                                     | 1 month                   | 12.6 ± 1.5                         | 12.6 ± 1.5                         | 0.852    |
| Potassium, mmol/l                   | Discharge                 | 4.5 ± 0.4                          | 4.4 ± 0.5                          | 0.197    |
|                                     | 1 month                   | 4.5 ± 0.4                          | 4.5 ± 0.5                          | 0.857    |
| BUN, mg/dl                          | Discharge                 | 19.7 ± 7.6                         | 20.9 ± 8.4                         | 0.063    |
|                                     | 1 month                   | 21.3 ± 6.9                         | 22.6 ± 9.0                         | 0.052    |

eGFR, estimated glomerular filtration rate; BUN, blood urea nitrogen

Table S3. Comparison between survived and deceased patients

| Variables                         | Survived patients<br>(N=502) | Deceased patients<br>(N=78) | <i>P</i> |
|-----------------------------------|------------------------------|-----------------------------|----------|
| Male                              | 352 (70.1%)                  | 54 (69.2%)                  | 0.979    |
| Age, years                        | 65.0 (58.0;72.0)             | 71.0 (65.0;76.0)            | < 0.001  |
| BMI, kg/m <sup>2</sup>            | 25.6 (23.6;27.9)             | 24.4 (22.5;26.7)            | 0.01     |
| SBP, mmHg                         | 125.0 (115.0;139.0)          | 128.5 (118.0;140.0)         | 0.191    |
| DBP, mmHg                         | 73.0 (67.0;80.0)             | 71.0 (66.0;77.0)            | 0.118    |
| DM                                | 139 (27.7%)                  | 25 (32.1%)                  | 0.509    |
| PCI or CABG                       | 16 (3.2%)                    | 4 (5.1%)                    | 0.589    |
| CVA                               | 29 (5.8%)                    | 3 (3.8%)                    | 0.668    |
| Dyslipidemia                      | 32 (6.4%)                    | 3 (3.8%)                    | 0.537    |
| β-blocker                         | 105 (20.9%)                  | 13 (16.7%)                  | 0.474    |
| Calcium channel blocker           | 334 (66.5%)                  | 56 (71.8%)                  | 0.429    |
| Diuretics                         | 137 (27.3%)                  | 20 (25.6%)                  | 0.866    |
| Cancer types                      |                              |                             | 0.004    |
| Renal cell carcinoma              | 346 (68.9%)                  | 41 (52.6%)                  |          |
| Urothelial cell carcinoma         | 105 (20.9%)                  | 23 (29.5%)                  |          |
| Liposarcoma                       | 14 (2.8%)                    | 7 (9.0%)                    |          |
| Other                             | 14 (2.8%)                    | 5 (6.4%)                    |          |
| Non-cancer                        | 23 (4.6%)                    | 2 (2.6%)                    |          |
| Cancer stages                     |                              |                             | < 0.001  |
| stage 1                           | 235 (46.8%)                  | 11 (14.1%)                  |          |
| stage 2                           | 85 (16.9%)                   | 9 (11.5%)                   |          |
| stage 3                           | 135 (26.9%)                  | 36 (46.2%)                  |          |
| stage 4                           | 24 (4.8%)                    | 20 (25.6%)                  |          |
| Non-cancer                        | 23 (4.6%)                    | 2 (2.6%)                    |          |
| Cancer stages                     |                              |                             | < 0.001  |
| limited stage (1 and 2)           | 320 (63.7%)                  | 20 (25.6%)                  |          |
| advanced stage (3 and 4)          | 159 (31.7%)                  | 56 (71.8%)                  |          |
| Non-cancer                        | 23 (4.6%)                    | 2 (2.6%)                    |          |
| Laboratory findings, preoperative |                              |                             |          |
| BUN, mg/dl                        | 16.0 (13.2;19.6)             | 17.2 (13.5;21.0)            | 0.26     |
| Hb, g/dl                          | 13.7 (12.6;14.7)             | 12.4 (10.4;13.8)            | < 0.001  |
| K, mmol/l                         | 4.3 (4.1; 4.5)               | 4.4 (4.2; 4.7)              | 0.003    |
| Urine albumin                     |                              |                             | 0.33     |
| Negative                          | 352 (70.5%)                  | 48 (61.5%)                  |          |
| Trace                             | 65 (13.0%)                   | 10 (12.8%)                  |          |
| +                                 | 39 (7.8%)                    | 9 (11.5%)                   |          |

|                                  |                  |                  |       |
|----------------------------------|------------------|------------------|-------|
| ++                               | 27 (5.4%)        | 8 (10.3%)        |       |
| +++                              | 16 (3.2%)        | 3 (3.8%)         |       |
| eGFR <sup>a</sup> , preoperative | 80.8 (68.1;90.8) | 73.4 (59.4;88.0) | 0.008 |
| eGFR, preoperative < 60          | 76 (15.1%)       | 20 (25.6%)       | 0.031 |
| eGFR, preoperative < 30          | 4 (0.8%)         | 3 (3.8%)         | 0.082 |
| eGFR, at discharge               | 54.0 (45.0;62.2) | 48.6 (36.5;59.8) | 0.01  |
| eGFR, at discharge < 30          | 28 (5.6%)        | 10 (12.8%)       | 0.031 |
| eGFR, at 1 mo                    | 52.4 (42.9;61.0) | 49.8 (36.0;59.2) | 0.066 |
| eGFR, at 6 mo                    | 52.0 (42.7;61.0) | 48.9 (34.5;62.2) | 0.145 |
| eGFR, at 12 mo                   | 52.0 (42.7;61.7) | 43.1 (33.0;54.5) | 0.001 |
| ESKD                             | 5 (1.0%)         | 2 (2.6%)         | 0.001 |

Continuous variables are expressed as mean  $\pm$  standard deviation or median (interquartile range), and categorical variables are expressed as numbers (%)

<sup>a</sup>eGFR was expressed as mL/min/1.73 m<sup>2</sup>

BMI, body mass index; SBP, systolic blood pressure; DBP, diastolic blood pressure; DM, diabetes mellitus; PCI, percutaneous coronary intervention; CABG, coronary artery bypass graft; CVA, cerebrovascular accident; eGFR, estimated glomerular filtration rate; BUN, blood urea nitrogen; Hb, hemoglobin; ESKD, end stage kidney disease

**Table S4.** Comparison between survived and deceased patients, according to RAS blocker use

| Variable                             | RAS blocker (+)              |                             | <i>P</i> | RAS blocker (-)              |                             | <i>P</i> |
|--------------------------------------|------------------------------|-----------------------------|----------|------------------------------|-----------------------------|----------|
|                                      | Survived patients<br>(N=274) | Deceased patients<br>(N=34) |          | Survived patients<br>(N=228) | Deceased patients<br>(N=44) |          |
| Male                                 | 195 (71.2%)                  | 25 (73.5%)                  | 0.931    | 157 (68.9%)                  | 29 (65.9%)                  | 0.835    |
| Age, years                           | 63.4 ± 10.5                  | 67.0 ± 9.5                  | 0.057    | 67.0 (59.0;74.0)             | 73.0 (69.0;78.0)            | <0.001   |
| BMI, kg/m <sup>2</sup>               | 25.8 (23.7;28.6)             | 24.4 (23.2;26.7)            | 0.053    | 25.5 (23.5;27.4)             | 24.4 (22.1;26.8)            | 0.111    |
| SBP, mmHg                            | 124.0<br>(114.0;138.0)       | 128.0<br>(117.0;144.0)      | 0.271    | 128.6 ± 16.7                 | 130.0 ± 14.6                | 0.604    |
| DBP, mmHg                            | 72.8 ± 10.2                  | 72.6 ± 8.9                  | 0.910    | 73.0 (68.0;80.0)             | 70.0 (62.5;77.5)            | 0.067    |
| DM                                   | 80 (29.2%)                   | 12 (35.3%)                  | 0.593    | 59 (25.9%)                   | 13 (29.5%)                  | 0.750    |
| PCI or CABG                          | 12 (4.4%)                    | 1 (2.9%)                    | 1.000    | 4 (1.8%)                     | 3 (6.8%)                    | 0.155    |
| CVA                                  | 13 (4.7%)                    | 1 (2.9%)                    | 0.968    | 16 (7.0%)                    | 2 (4.5%)                    | 0.785    |
| Dyslipidemia                         | 17 (6.2%)                    | 1 (2.9%)                    | 0.706    | 15 (6.6%)                    | 2 (4.5%)                    | 0.865    |
| β-blocker                            | 46 (16.8%)                   | 4 (11.8%)                   | 0.615    | 59 (25.9%)                   | 9 (20.5%)                   | 0.568    |
| Calcium channel blocker              | 155 (56.6%)                  | 22 (64.7%)                  | 0.471    | 179 (78.5%)                  | 34 (77.3%)                  | 1.000    |
| Diuretics                            | 95 (34.7%)                   | 10 (29.4%)                  | 0.676    | 42 (18.4%)                   | 10 (22.7%)                  | 0.649    |
| Cancer types                         |                              |                             | 0.010    |                              |                             | 0.212    |
| Renal cell carcinoma                 | 193 (70.4%)                  | 19 (55.9%)                  |          | 153 (67.1%)                  | 22 (50.0%)                  |          |
| Urothelial cell carcinoma            | 54 (19.7%)                   | 8 (23.5%)                   |          | 51 (22.4%)                   | 15 (34.1%)                  |          |
| Liposarcoma                          | 8 (2.9%)                     | 4 (11.8%)                   |          | 6 (2.6%)                     | 3 (6.8%)                    |          |
| Other                                | 6 (2.2%)                     | 3 (8.8%)                    |          | 8 (3.5%)                     | 2 (4.5%)                    |          |
| Non-cancer                           | 13 (4.7%)                    | 0 (0.0%)                    |          | 10 (4.4%)                    | 2 (4.5%)                    |          |
| Cancer stages                        |                              |                             | <0.001   |                              |                             | <0.001   |
| stage 1                              | 128 (46.7%)                  | 2 (5.9%)                    |          | 107 (46.9%)                  | 9 (20.5%)                   |          |
| stage 2                              | 42 (15.3%)                   | 4 (11.8%)                   |          | 43 (18.9%)                   | 5 (11.4%)                   |          |
| stage 3                              | 79 (28.8%)                   | 18 (52.9%)                  |          | 56 (24.6%)                   | 18 (40.9%)                  |          |
| stage 4                              | 12 (4.4%)                    | 10 (29.4%)                  |          | 12 (5.3%)                    | 10 (22.7%)                  |          |
| Non-cancer                           | 13 (4.7%)                    | 0 (0.0%)                    |          | 10 (4.4%)                    | 2 (4.5%)                    |          |
| Cancer stages                        |                              |                             | <0.001   |                              |                             | <0.001   |
| limited stage (1 and 2)              | 170 (62.0%)                  | 6 (17.6%)                   |          | 150 (65.8%)                  | 14 (31.8%)                  |          |
| advanced stage (3 and 4)             | 91 (33.2%)                   | 28 (82.4%)                  |          | 68 (29.8%)                   | 28 (63.6%)                  |          |
| Non-cancer                           | 13 (4.7%)                    | 0 (0.0%)                    |          | 10 (4.4%)                    | 2 (4.5%)                    |          |
| Laboratory findings,<br>preoperative |                              |                             |          |                              |                             |          |
| BUN, mg/dl,                          | 16.0 (13.1;19.6)             | 17.3 (13.4;20.6)            | 0.450    | 16.0 (13.2;19.6)             | 17.1 (13.6;21.4)            | 0.415    |
| Hb, g/dl,                            | 13.8 (12.5;14.8)             | 12.4 (10.4;13.6)            | <0.001   | 13.6 ± 1.7                   | 12.4 ± 2.3                  | 0.002    |
| K, mmol/l                            | 4.3 (4.1; 4.6)               | 4.5 (4.2; 4.9)              | 0.047    | 4.3 (4.0; 4.5)               | 4.4 (4.2; 4.7)              | 0.020    |
| Urine albumin                        |                              |                             | 0.907    |                              |                             | 0.154    |

|                                  |                  |                  |       |                  |                  |        |
|----------------------------------|------------------|------------------|-------|------------------|------------------|--------|
| Negative                         | 192 (70.8%)      | 24 (70.6%)       |       | 160 (70.2%)      | 24 (54.5%)       |        |
| Trace                            | 35 (12.9%)       | 3 (8.8%)         |       | 30 (13.2%)       | 7 (15.9%)        |        |
| +                                | 21 (7.7%)        | 4 (11.8%)        |       | 18 (7.9%)        | 5 (11.4%)        |        |
| ++                               | 16 (5.9%)        | 2 (5.9%)         |       | 11 (4.8%)        | 6 (13.6%)        |        |
| +++                              | 7 (2.6%)         | 1 (2.9%)         |       | 9 (3.9%)         | 2 (4.5%)         |        |
| eGFR <sup>a</sup> , preoperative | 81.5 (69.0;91.0) | 74.2 (67.8;91.1) | 0.403 | 78.5 (66.3;90.6) | 67.8 (51.7;85.4) | 0.010  |
| eGFR, preoperative < 60          | 32 (11.7%)       | 6 (17.6%)        | 0.471 | 44 (19.3%)       | 14 (31.8%)       | 0.098  |
| eGFR, preoperative < 30          | 2 (0.7%)         | 0 (0.0%)         | 1.000 | 2 (0.9%)         | 3 (6.8%)         | 0.038  |
| eGFR, at discharge               | 54.8 (46.9;62.7) | 49.7 (44.2;58.4) | 0.105 | 52.3 ± 15.2      | 46.6 ± 18.9      | 0.068  |
| eGFR, at discharge < 30          | 10 (3.6%)        | 1 (2.9%)         | 1.000 | 18 (7.9%)        | 9 (20.5%)        | 0.023  |
| eGFR, at 1 mo.                   | 53.8 (44.9;61.0) | 50.0 (41.3;58.3) | 0.137 | 50.9 ± 15.3      | 48.2 ± 19.7      | 0.397  |
| eGFR, at 6 mo.                   | 52.0 (43.7;61.3) | 49.4 (41.3;62.5) | 0.544 | 51.8 (40.3;61.0) | 47.7 (30.2;61.9) | 0.191  |
| eGFR, at 12 mo.                  | 52.9 ± 15.0      | 50.2 ± 17.4      | 0.425 | 51.8 ± 15.8      | 39.9 ± 18.8      | <0.001 |
| ESKD before death                | 1 (0.4%)         | 0 (0.0%)         | 1.000 | 4 (1.8%)         | 2 (4.5%)         | 0.553  |

Continuous variables are expressed as mean ± standard deviation or median (interquartile range), and categorical variables are expressed as numbers (%)

<sup>a</sup>eGFR was expressed as mL/min/1.73 m<sup>2</sup>

BMI, body mass index; SBP, systolic blood pressure; DBP, diastolic blood pressure; DM, diabetes mellitus; PCI: percutaneous coronary intervention; CABG, coronary artery bypass graft; CVA, cerebrovascular accident; eGFR, estimated glomerular filtration rate; BUN, Blood urea nitrogen; Hb, hemoglobin, K, potassium; ESKD, end stage kidney disease.



**Table S5.** The risk of mortality and composite outcome of ESKD and mortality according to RAS blocker use with calcium channel blocker instead of  $\beta$ -blocker

|                    | Mortality |              |          | ESKD or mortality |              |          |
|--------------------|-----------|--------------|----------|-------------------|--------------|----------|
|                    | HR        | 95% CI       | <i>P</i> | HR                | 95% CI       | <i>P</i> |
| <b>Univariable</b> | 0.644     | 0.412, 1.008 | 0.054    | 0.603             | 0.390, 0.932 | 0.023    |
| <b>Model 1</b>     | 0.694     | 0.434, 1.110 | 0.128    | 0.653             | 0.412, 1.034 | 0.069    |
| <b>Model 2</b>     | 0.625     | 0.389, 1.004 | 0.052    | 0.6               | 0.377, 0.953 | 0.030    |
| <b>Model 3</b>     | 0.584     | 0.361, 0.944 | 0.028    | 0.557             | 0.348, 0.890 | 0.014    |

Model 1 was adjusted for age, sex, body mass index, medical history (diabetes mellitus, coronary artery bypass graft or percutaneous coronary intervention, cerebrovascular accident, and dyslipidemia), and the use of calcium channel blockers.

Model 2: Model 1 + was adjusted for initial laboratory tests including estimated glomerular filtration rate, blood urea nitrogen, hemoglobin, potassium, and urine albumin

Model 3: Model 2 + adjusted for cancer type, stages and adjuvant treatment

**Table S6.** Characteristics of patients after propensity score matching

| <b>Variables</b>                  | <b>RAS blocker (+)<br/>(N=186)</b> | <b>RAS blocker (-)<br/>(N=186)</b> | <b>P</b> |
|-----------------------------------|------------------------------------|------------------------------------|----------|
| Male                              | 135 (72.6%)                        | 136 (73.1%)                        | 1.000    |
| Age, years                        | 66.0 [58.0;72.0]                   | 66.5 [59.0;73.0]                   | 0.695    |
| BMI, kg/m <sup>2</sup>            | 25.9 [23.6;28.4]                   | 25.4 [23.4;27.5]                   | 0.102    |
| SBP, mmHg                         | 127.7 ± 16.0                       | 128.4 ± 16.5                       | 0.688    |
| DBP, mmHg                         | 73.3 ± 10.3                        | 73.8 ± 11.7                        | 0.679    |
| DM                                | 53 (28.5%)                         | 50 (26.9%)                         | 0.817    |
| PCI or CABG                       | 8 (4.3%)                           | 6 (3.2%)                           | 0.785    |
| Dyslipidemia                      | 13 (7.0%)                          | 11 (5.9%)                          | 0.833    |
| CVA                               | 11 (5.9%)                          | 10 (5.4%)                          | 1.000    |
| β-blockers                        | 39 (21.0%)                         | 48 (25.8%)                         | 0.327    |
| Calcium channel blockers          | 144 (77.4%)                        | 136 (73.1%)                        | 0.400    |
| Diuretics                         | 62 (33.3%)                         | 41 (22.0%)                         | 0.020    |
| Antihypertensive medication count |                                    |                                    | < 0.001  |
| 1                                 | 18 (9.7%)                          | 150 (80.6%)                        |          |
| 2                                 | 100 (53.8%)                        | 33 (17.7%)                         |          |
| 3                                 | 59 (31.7%)                         | 3 (1.6%)                           |          |
| 4                                 | 9 (4.8%)                           | 0 (0.0%)                           |          |
| Cancer                            | 179 (96.2%)                        | 180 (96.8%)                        | 1.000    |
| Cancer types                      |                                    |                                    | 0.910    |
| Renal cell carcinoma              | 130 (69.9%)                        | 123 (66.1%)                        |          |
| Urothelial cell carcinoma         | 34 (18.3%)                         | 40 (21.5%)                         |          |
| Liposarcoma                       | 8 (4.3%)                           | 7 (3.8%)                           |          |
| Other                             | 7 (3.8%)                           | 9 (4.8%)                           |          |
| Non-cancer                        | 7 (3.8%)                           | 7 (3.8%)                           |          |
| Cancer stages                     |                                    |                                    | 0.928    |
| Stage 1                           | 73 (39.2%)                         | 77 (41.4%)                         |          |
| Stage 2                           | 32 (17.2%)                         | 34 (18.3%)                         |          |
| Stage 3                           | 59 (31.7%)                         | 51 (27.4%)                         |          |
| Stage 4                           | 15 (8.1%)                          | 17 (9.1%)                          |          |
| Non-cancer                        | 7 (3.8%)                           | 7 (3.8%)                           |          |
| Cancer stage                      |                                    |                                    | 0.811    |
| Limited stage (1 and 2)           | 105 (56.5%)                        | 111 (59.7%)                        |          |
| Advanced stage (3 and 4)          | 74 (39.8%)                         | 68 (36.6%)                         |          |
| Non-cancer                        | 7 (3.8%)                           | 7 (3.8%)                           |          |
| Adjuvant Tx., systemic            | 30 (16.1%)                         | 26 (14.0%)                         | 0.664    |

|                                   |                  |                  |       |
|-----------------------------------|------------------|------------------|-------|
| Adjuvant Tx., localized           | 11 (5.9%)        | 11 (5.9%)        | 1.000 |
| Smoking History                   |                  |                  | 0.265 |
| None                              | 106 (57.0%)      | 101 (54.3%)      |       |
| Ex                                | 41 (22.0%)       | 55 (29.6%)       |       |
| Current                           | 17 (9.1%)        | 16 (8.6%)        |       |
| No data                           | 22 (11.8%)       | 14 (7.5%)        |       |
| Drinking History                  |                  |                  | 0.623 |
| None                              | 102 (54.8%)      | 103 (55.4%)      |       |
| Ex                                | 28 (15.1%)       | 28 (15.1%)       |       |
| Current                           | 33 (17.7%)       | 39 (21.0%)       |       |
| No data                           | 23 (12.4%)       | 16 (8.6%)        |       |
| Laboratory findings, preoperative |                  |                  |       |
| eGFR, ml/min/1.73 m <sup>2</sup>  | 79.2 [67.8;90.2] | 79.7 [67.0;91.5] | 0.957 |
| BUN, mg/dl                        | 16.3 [13.2;20.1] | 15.9 [13.2;19.3] | 0.427 |
| Hemoglobin, g/dl                  | 13.8 [12.4;14.8] | 13.7 [12.3;14.7] | 0.952 |
| Uric acid, mg/dl                  | 5.8 ± 1.6        | 5.4 ± 1.6        | 0.024 |
| Potassium, mmol/l                 | 4.3 [4.1; 4.6]   | 4.3 [4.0; 4.6]   | 0.809 |
| Urine albumin                     |                  |                  | 0.788 |
| Negative                          | 127 (68.3%)      | 130 (69.9%)      |       |
| Trace                             | 28 (15.1%)       | 24 (12.9%)       |       |
| +                                 | 13 (7.0%)        | 16 (8.6%)        |       |
| ++                                | 13 (7.0%)        | 9 (4.8%)         |       |
| +++                               | 5 (2.7%)         | 7 (3.8%)         |       |
| Hospital stays, d                 | 8 [8; 9]         | 8 [8;10]         | 0.155 |
| Follow-up period, mo              | 35 [35;35]       | 35 [33;35]       | 0.024 |

Continuous variables are expressed as mean ± standard deviation or median (interquartile range), and categorical variables are expressed as numbers (%).

BMI, body mass index; SBP, systolic blood pressure; DBP, diastolic blood pressure; DM, diabetes mellitus; PCI: percutaneous coronary intervention; CABG, coronary artery bypass graft; CVA, cerebrovascular accident; Tx, treatment; eGFR, estimated glomerular filtration rate; BUN, blood urea nitrogen.

**Table S7.** Renal outcomes and hyperkalemia findings according to RAS blockers use after propensity score matching

| <b>Variables</b>    | <b>Time from surgery</b> | <b>RAS blocker (+)<br/>N=186</b> | <b>RAS blocker (-)<br/>N=186</b> | <b><i>P</i></b> |
|---------------------|--------------------------|----------------------------------|----------------------------------|-----------------|
| Renal adaptation, % | Discharge                | 69.0 ± 10.0                      | 67.5 ± 11.6                      | 0.210           |
|                     | 1 month                  | 67.4 ± 10.1                      | 66.8 ± 11.9                      | 0.606           |
| Acute kidney injury | 1 month                  | 8 (4.3%)                         | 10 (5.4%)                        | 0.629           |
| ESKD (1000 PY)      | 3 years                  | 0                                | 8.3                              | 0.038           |
| Hyperkalemia        | Discharge                | 5/186 (2.7%)                     | 6/186 (3.2%)                     | 1.000           |
|                     | 1 month                  | 5/186 (2.7%)                     | 6/186 (3.2%)                     | 1.000           |
|                     | 6 months                 | 4/148 (2.7%)                     | 4/143 (2.8%)                     | 1.000           |
|                     | 12 months                | 3/132 (2.3%)                     | 2/121 (1.7%)                     | 1.000           |

Continuous variables are expressed as mean ± standard deviation, and categorical variables are expressed as numbers (%).

ESKD, end-stage kidney disease; PY, person-year; RAS, renin-angiotensin system

**Table S8.** The risk of mortality and composite outcome of ESKD and mortality according to RAS blocker use after propensity score matching

|                    | Mortality |              |          | ESKD or mortality |              |          |
|--------------------|-----------|--------------|----------|-------------------|--------------|----------|
|                    | HR        | 95% CI       | <i>P</i> | HR                | 95% CI       | <i>P</i> |
| <b>Univariable</b> | 0.620     | 0.361, 1.063 | 0.082    | 0.609             | 0.360, 1.031 | 0.065    |
| <b>Model 1</b>     | 0.620     | 0.360, 1.068 | 0.085    | 0.615             | 0.362, 1.046 | 0.073    |
| <b>Model 2</b>     | 0.564     | 0.323, 0.984 | 0.044    | 0.560             | 0.326, 0.962 | 0.036    |
| <b>Model 3</b>     | 0.495     | 0.278, 0.879 | 0.016    | 0.504             | 0.289, 0.881 | 0.016    |

Model 1 was adjusted for age, sex, body mass index, and medical history (diabetes mellitus, coronary artery bypass graft or percutaneous coronary intervention, cerebrovascular accident, and dyslipidemia) + beta-blocker use.

Model 2: Model 1 + was adjusted for initial laboratory tests including estimated glomerular filtration rate, blood urea nitrogen, hemoglobin, potassium, and urine albumin.

Model 3: Model 2 + adjusted for cancer type, stages, and adjuvant treatment

CI, confidence interval; ESKD, end-stage kidney disease; HR, hazard ratio; RAS, renin-angiotensin system

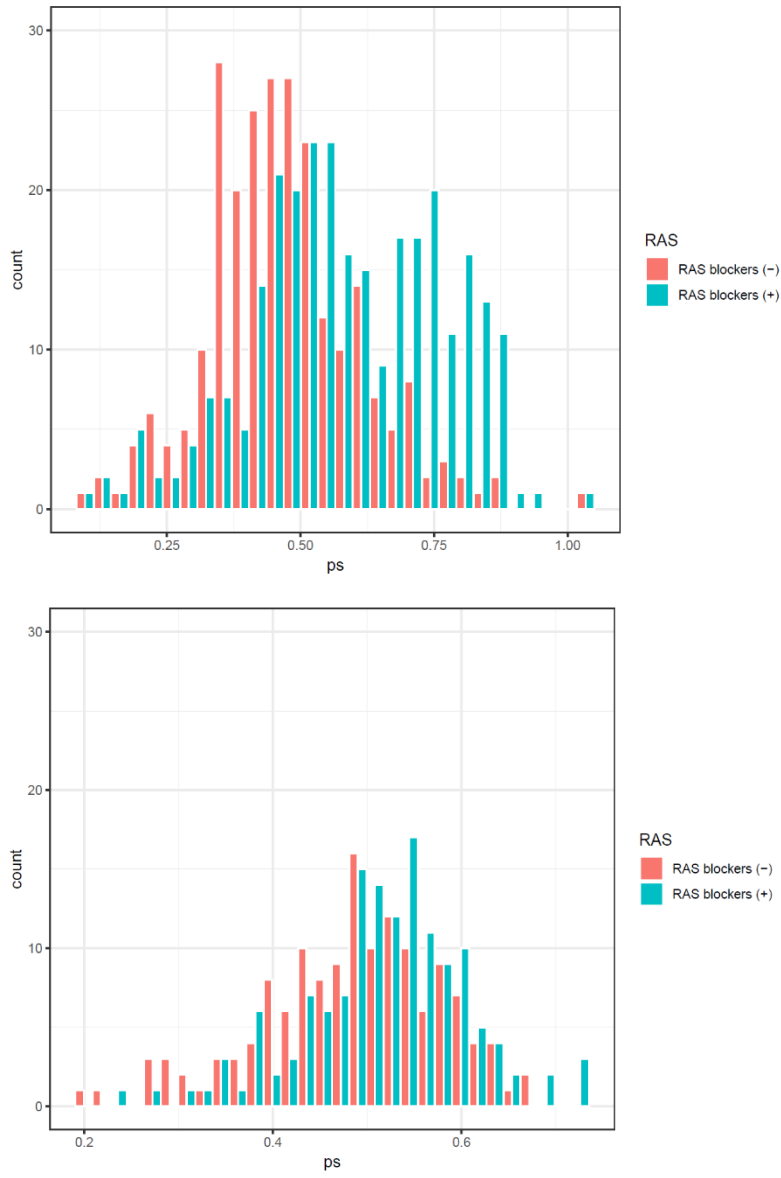

**Figure S1.** Distribution of propensity scores before and after matching. (A) Distribution of propensity scores before matching. (B) Distribution of propensity scores after matching

(A)

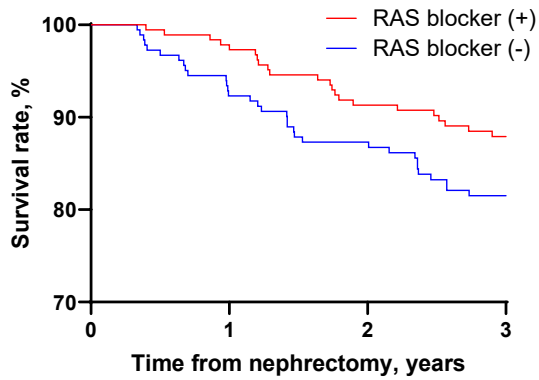

| Numbers at risk |     |     |     |     |
|-----------------|-----|-----|-----|-----|
| RAS blocker (+) | 186 | 179 | 165 | 153 |
| RAS blocker (-) | 186 | 167 | 155 | 138 |

(B)

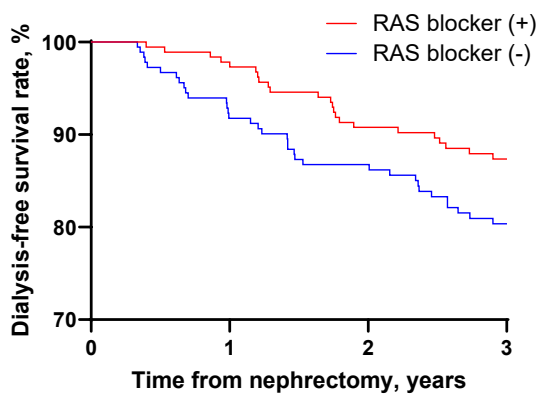

| Numbers at risk |     |     |     |     |
|-----------------|-----|-----|-----|-----|
| RAS blocker (+) | 186 | 179 | 164 | 152 |
| RAS blocker (-) | 186 | 166 | 154 | 136 |

**Figure S2.** Kaplan-Meier curves according to RAS blocker use after propensity score matching. After propensity score matching, (A) overall survival ( $P$ -value = 0.079) and (B) dialysis-free survival ( $P$ -value = 0.062) tended to be better in the RAS blockers group compared with the control group, but this was not statistically significant.

STROBE Statement—Checklist of items that should be included in reports of *cohort studies*

|                              | Item No | Recommendation                                                                                                                                                                                    | Page No      |
|------------------------------|---------|---------------------------------------------------------------------------------------------------------------------------------------------------------------------------------------------------|--------------|
| <b>Title and abstract</b>    | 1       | (a) Indicate the study's design with a commonly used term in the title or the abstract                                                                                                            | 1,3          |
|                              |         | (b) Provide in the abstract an informative and balanced summary of what was done and what was found                                                                                               | 3,4          |
| <b>Introduction</b>          |         |                                                                                                                                                                                                   |              |
| Background/rationale         | 2       | Explain the scientific background and rationale for the investigation being reported                                                                                                              | 5            |
| Objectives                   | 3       | State specific objectives, including any prespecified hypotheses                                                                                                                                  | 6            |
| <b>Methods</b>               |         |                                                                                                                                                                                                   |              |
| Study design                 | 4       | Present key elements of study design early in the paper                                                                                                                                           | 7            |
| Setting                      | 5       | Describe the setting, locations, and relevant dates, including periods of recruitment, exposure, follow-up, and data collection                                                                   | 7            |
| Participants                 | 6       | (a) Give the eligibility criteria, and the sources and methods of selection of participants. Describe methods of follow-up                                                                        | 7,9          |
| Variables                    | 7       | Clearly define all outcomes, exposures, predictors, potential confounders, and effect modifiers. Give diagnostic criteria, if applicable                                                          | 7-10         |
| Data sources/<br>measurement | 8*      | For each variable of interest, give sources of data and details of methods of assessment (measurement). Describe comparability of assessment methods if there is more than one group              | 7,8          |
| Bias                         | 9       | Describe any efforts to address potential sources of bias                                                                                                                                         | 7,11         |
| Study size                   | 10      | Explain how the study size was arrived at                                                                                                                                                         | 7            |
| Quantitative variables       | 11      | Explain how quantitative variables were handled in the analyses. If applicable, describe which groupings were chosen and why                                                                      | 9,10         |
| Statistical methods          | 12      | (a) Describe all statistical methods, including those used to control for confounding                                                                                                             | 10-12        |
|                              |         | (b) Describe any methods used to examine subgroups and interactions                                                                                                                               | 10           |
|                              |         | (c) Explain how missing data were addressed                                                                                                                                                       | 11           |
|                              |         | (d) If applicable, explain how loss to follow-up was addressed                                                                                                                                    | 11           |
|                              |         | (e) Describe any sensitivity analyses                                                                                                                                                             | 11-12        |
| <b>Results</b>               |         |                                                                                                                                                                                                   |              |
| Participants                 | 13*     | (a) Report numbers of individuals at each stage of study—eg numbers potentially eligible, examined for eligibility, confirmed eligible, included in the study, completing follow-up, and analysed | 7            |
|                              |         | (b) Give reasons for non-participation at each stage                                                                                                                                              | 7            |
|                              |         | (c) Consider use of a flow diagram                                                                                                                                                                | Fig1.        |
| Descriptive data             | 14*     | (a) Give characteristics of study participants (eg demographic, clinical, social) and information on exposures and potential confounders                                                          | 12           |
|                              |         | (b) Indicate number of participants with missing data for each variable of interest                                                                                                               | 12<br>Table1 |
|                              |         | (c) Summarise follow-up time (eg, average and total amount)                                                                                                                                       | 12           |
| Outcome data                 | 15*     | Report numbers of outcome events or summary measures over time                                                                                                                                    | 12-18        |



|                          |    |                                                                                                                                                                                                              |                                         |
|--------------------------|----|--------------------------------------------------------------------------------------------------------------------------------------------------------------------------------------------------------------|-----------------------------------------|
| Main results             | 16 | (a) Give unadjusted estimates and, if applicable, confounder-adjusted estimates and their precision (eg, 95% confidence interval). Make clear which confounders were adjusted for and why they were included | 10-16, Table2, Table3, Figure2, Figure3 |
| Other analyses           | 17 | Report other analyses done—eg analyses of subgroups and interactions, and sensitivity analyses                                                                                                               | 16-18 Table4, Figure4, Figure5, Figure6 |
| <b>Discussion</b>        |    |                                                                                                                                                                                                              |                                         |
| Key results              | 18 | Summarise key results with reference to study objectives                                                                                                                                                     | 18-19                                   |
| Limitations              | 19 | Discuss limitations of the study, taking into account sources of potential bias or imprecision. Discuss both direction and magnitude of any potential bias                                                   | 22                                      |
| Interpretation           | 20 | Give a cautious overall interpretation of results considering objectives, limitations, multiplicity of analyses, results from similar studies, and other relevant evidence                                   | 19-21                                   |
| Generalisability         | 21 | Discuss the generalisability (external validity) of the study results                                                                                                                                        | 20,21                                   |
| <b>Other information</b> |    |                                                                                                                                                                                                              |                                         |
| Funding                  | 22 | Give the source of funding and the role of the funders for the present study and, if applicable, for the original study on which the present article is based                                                | 24                                      |

\*Give information separately for exposed and unexposed groups.

**Note:** An Explanation and Elaboration article discusses each checklist item and gives methodological background and published examples of transparent reporting. The STROBE checklist is best used in conjunction with this article (freely available on the Web sites of PLoS Medicine at <http://www.plosmedicine.org/>, Annals of Internal Medicine at <http://www.annals.org/>, and Epidemiology at <http://www.epidem.com/>). Information on the STROBE Initiative is available at <http://www.strobe-statement.org>.
